1 **Title**

2 **Ribosome provisioning activates a bistable switch coupled to fast exit from stationary**  
3 **phase**

4

5 **Authors:**

6 P. Remigi<sup>1\*</sup>, G.C. Ferguson<sup>2</sup>, S. De Monte<sup>3,4</sup> and P.B. Rainey<sup>1,5,6\*</sup>

7 <sup>1</sup> New Zealand Institute for Advanced Study, Massey University, Auckland 0745, New  
8 Zealand

9 <sup>2</sup> Institute of Natural and Mathematical Sciences, Massey University, Auckland 0745, New  
10 Zealand

11 <sup>3</sup> Institut de biologie de l'Ecole normale supérieure (IBENS), Ecole normale supérieure, CNRS,  
12 INSERM, PSL Université Paris 75005 Paris, France

13 <sup>4</sup> Department of Evolutionary Theory, Max Planck Institute for Evolutionary Biology, Plön  
14 24306, Germany

15 <sup>5</sup> Department of Microbial Population Biology, Max Planck Institute for Evolutionary Biology,  
16 Plön 24306, Germany

17 <sup>6</sup> Ecole Supérieure de Physique et de Chimie Industrielles de la Ville de Paris (ESPCI Paris  
18 Tech), CNRS UMR 8231, PSL Research University, 75231 Paris, France

19

20 **\* Corresponding authors:**

21 Philippe Remigi ([philippe.remigi@gmail.com](mailto:philippe.remigi@gmail.com)) and Paul B. Rainey ([rainey@evolbio.mpg.de](mailto:rainey@evolbio.mpg.de))

22

23 **Abstract:**

24 Observations of bacteria at the single-cell level have revealed many instances of phenotypic  
25 heterogeneity within otherwise clonal populations, but the selective causes, molecular bases  
26 and broader ecological relevance remain poorly understood. In an earlier experiment in  
27 which the bacterium *Pseudomonas fluorescens* SBW25 was propagated under a selective  
28 regime that mimicked the host immune response, a genotype evolved that stochastically  
29 switched between capsulation states. The genetic cause was a mutation in *carB* that  
30 decreased the pyrimidine pool (and growth rate), lowering the activation threshold of a pre-  
31 existing but hitherto unrecognised phenotypic switch. Genetic components surrounding  
32 bifurcation of UTP flux towards DNA/RNA or UDP-glucose (a precursor of colanic acid  
33 forming the capsules) were implicated as key components. Extending these molecular  
34 analyses – and based on a combination of genetics, transcriptomics, biochemistry and  
35 mathematical modelling – we show that pyrimidine limitation triggers an increase in  
36 ribosome biosynthesis and that switching is caused by competition between ribosomes and  
37 CsrA/RsmA proteins for the mRNA transcript of a feed-forward regulator of colanic acid  
38 biosynthesis. We additionally show that in the ancestral bacterium the switch is part of a  
39 programme that determines stochastic entry into the semi-quiescent capsulated state,  
40 ensures that such cells are provisioned with excess ribosomes, and enables provisioned cells  
41 to exit rapidly from stationary phase under permissive conditions.

42

43

44 **Introduction:**

45 Phenotypic variation between isogenic cells growing in homogeneous environments can  
46 have adaptive consequences, allowing populations to survive unpredictable environmental  
47 changes or promoting interactions between different cell types<sup>1,2</sup>. Natural selection, by  
48 means of genetic mutations affecting the integration of stochastic noise within signaling  
49 pathways, can fine-tune epigenetic switches<sup>3-7</sup> but the molecular details underpinning the  
50 evolution of phenotypic heterogeneity remain poorly understood.

51 Opportunity to study the genetic bases of the evolution of phenotypic heterogeneity arose  
52 from a selection experiment where the capacity to switch between different colony  
53 phenotypes evolved *de novo* in the bacterium *Pseudomonas fluorescens* SBW25 (ref. 8). In  
54 this experiment, bacteria were passaged through consecutive cycles comprised of single-cell  
55 bottlenecks and negative frequency-dependent selection, a regime mimicking essential  
56 features of the adaptive immune system in animals. A genotype emerged (1B4) that forms  
57 distinct opaque or translucent colonies on agar plates. At the single-cell level, this behaviour  
58 reflects an epigenetic switch characterized by the bistable production of an extracellular  
59 capsule, resulting in the coexistence of two sub-populations of capsulated (Cap<sup>+</sup>) or non-  
60 capsulated (Cap<sup>-</sup>) cells. Capsules are made of a colanic acid-like polymer, whose production  
61 arises from the activity of the *wcaJ-wzb* locus and requires the precursor UDP-glucose. A  
62 mutation in *carB* (c2020t), a gene involved in *de novo* pyrimidine biosynthesis, is responsible  
63 for heterogeneous capsule production via a decrease in intracellular pyrimidine pools<sup>8,9</sup>.  
64 Additionally, the switch between capsulated and uncapsulated cells was found to be active  
65 in the ancestral genotype devoid of the *carB* mutation – the *carB* mutation having altered  
66 the threshold at which the switch is activated – and to underpin the stochastic entry of cells  
67 into a semi-quiescent state.

68 Here we extend earlier work and provide mechanistic understanding of how the *carB*  
69 mutation determines capsulation heterogeneity. Of central importance is evidence that  
70 ribosome biosynthesis is up-regulated upon pyrimidine limitation and that this favors  
71 translation of a positively auto-regulated activator of capsular exopolysaccharide  
72 biosynthesis that is otherwise inhibited by CsrA/Rsm proteins. The switch comprises part of  
73 a programme that facilitates stochastic entry into a semi-quiescent state and rapid exit from  
74 this state upon realisation of permissive conditions through modulation of ribosome levels.

## 75 **Results**

### 76 **Capsulation is not induced by UDP-glucose depletion**

77 Previous work analysed the switcher genotype 1B4 (ref. 8) and the link between pyrimidine  
78 limitation (caused by a defect in CarB), growth and heterogeneous expression of capsules<sup>9</sup>.  
79 Particular attention was given to bifurcation of UTP flux towards DNA/RNA, or UDP-glucose  
80 (a precursor of colanic acid from which capsules are synthesised). Extensive analyses  
81 showed that capsule production was tied to entry into a semi-quiescent state triggered by  
82 reduction of flux through the pyrimidine biosynthetic pathway. The primary signalling  
83 molecule was not identified, but it was hypothesised to be a product of the pyrimidine  
84 biosynthetic pathway<sup>9</sup>, with UDP-glucose being a prime candidate given its role in regulation  
85 of cell size and bacterial growth<sup>10</sup>.

86 To test the hypothesis that UDP-glucose underpins the switch to capsule production, a  
87 translational (GFP) reporter fused to PFLU3655 (the primary transcriptional activator of the  
88 *wcaJ-wzb* operon, see ref. 9 and below) was introduced into the chromosome of a *galU*  
89 mutant of 1B4. The *galU* mutant is unable to convert UTP to UDP-glucose and is therefore  
90 Cap<sup>-</sup> (ref. 9). The proportion of cells expressing the *Ppflu3655*-GFP reporter was reduced in  
91 the mutant compared to the 1B4 switching genotype (Supplementary Figure 1). This finding  
92 was inconsistent with the prediction that low UDP-glucose is the signal that increases the  
93 chance of switching to the capsulated state. Accordingly the mechanistic links between  
94 pyrimidine limitation, growth and the heterogeneous production of capsules were  
95 reassessed.

### 96 **Ribosomes are over-produced in *carB* mutants**

97 Transcriptomic data published previously<sup>9</sup> was interrogated to identify signalling pathways  
98 displaying different levels of activity as a result of the causal *carB* mutation. KEGG-  
99 enrichment analyses showed over-representation of ribosomal components among the  
100 genes that are expressed at least two-fold more in the capsulated sub-population of 1B4  
101 (1B4 Cap<sup>+</sup>) compared to its (non-capsulated) ancestor 1A4 (Supplementary Table 1). By  
102 extracting raw expression values from the available RNAseq datasets, it was found that the  
103 average expression levels of ribosomal protein genes increased in 1B4 (in both Cap<sup>-</sup> and  
104 Cap<sup>+</sup>) compared to 1A4 or SBW25 (Fig. 1a). Such a finding is surprising since ribosome  
105 production is usually proportional to growth rate<sup>11,12</sup> and was expected to be reduced in the  
106 slower growing strain 1B4 (Supplementary Figure 2).

107 Bacteria adjust ribosome concentration to match nutrient availability in order to maximise  
 108 growth rate. They do so by modulating transcriptional activity at ribosomal RNA (*rrn*)  
 109 operon promoters<sup>11,12</sup> causing the production of ribosomal proteins to match available rRNA  
 110 (ref. 13). The over-expression of ribosomal protein genes in 1B4 may therefore reflect  
 111 transcriptional up-regulation at *rrn* promoters. Using a chromosomally-integrated reporter,  
 112 an increase in *PrrnB*-GFP transcriptional activity was detected in *carB* mutants compared to  
 113 immediate ancestral types (Fig. 1b). This difference was most obvious when cultures  
 114 reached OD~2, a density at which 1B4 cultures undergo a noticeable increase in capsulation  
 115 (Supplementary Figure 3). Supplementing growth media with 2mM uracil – a treatment  
 116 known to suppress capsulation<sup>9</sup> – restored wild-type *PrrnB*-GFP expression in strains  
 117 carrying the mutant *carB* allele (Fig. 1b). Measurement of cellular RNA content also showed  
 118 higher levels in *carB* mutants (Fig. 1c). These measurements were not affected by cell size  
 119 (Supplementary Figure 4) indicating a *bona fide* increase in ribosome concentration.  
 120 Together, these results show that pyrimidine limitation triggers the production of an  
 121 enhanced pool of ribosomes.

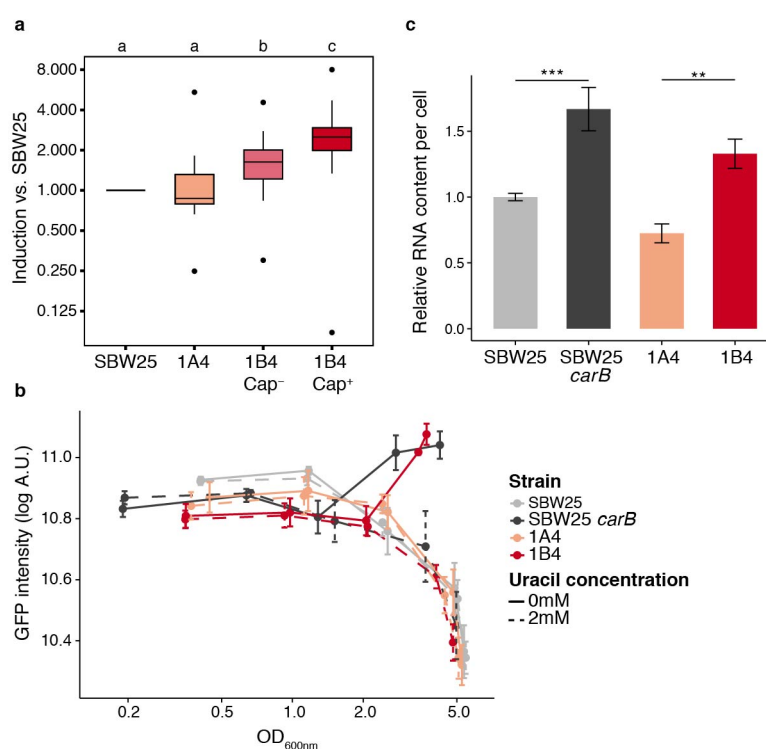

122

123 **Figure 1: Increased ribosome production in *carB* mutants**

124 **a**, Transcriptional induction of ribosomal protein genes in SBW25, 1A4, 1B4 Cap<sup>-</sup> and 1B4 Cap<sup>+</sup> cells.  
 125 Absolute expression levels of ribosomal protein genes (KEGG pathway '0310-Ribosomes', n=26) were  
 126 extracted from a previous RNA-seq dataset<sup>9</sup> and normalised to SBW25. Boxplots represent the  
 127 distribution of expression ratios. Bold segments inside rectangles show the median, lower and upper  
 128 limits of the box represent first and third quartiles, respectively. Whiskers extend up to 1.5 times the

129 interquartile range and dots represent outliers, if present. Letter groups indicate statistical  
130 significance,  $P < 0.05$ , Kruskal-Wallis test with Dunn's post-hoc correction. **b**, Expression kinetics of  
131 the *PrrnB*-GFP transcriptional reporter. Fluorescence in individual cells was measured by flow  
132 cytometry. Mean fluorescence of bacterial populations  $\pm$  s.d. over biological replicates are shown,  $n =$   
133 4. Data are representative of 3 independent experiments. **c**, Total RNA content in bacterial cells  
134 during exponential phase ( $OD_{600nm} = 0.5-0.6$ ). Values were normalised to SBW25 control within each  
135 experiment. Means  $\pm$  s.d. are shown,  $n = 6$ . Data are pooled from 4 independent experiments. \*\*  $P <$   
136 0.01, \*\*\*  $P < 0.001$ , two-tailed  $t$ -test.

137

### 138 **High ribosome levels are required for capsulation**

139 The counterintuitive effect of the *carB* mutation on ribosome levels suggested a causal  
140 connection between ribosome concentration and capsulation. In support of this hypothesis,  
141 a previous transposon-mutagenesis screen found that insertions in ribosome- or translation-  
142 associated genes (*prfC*, *rluB*, *rluC*, *glu/gly* tRNA) decreased or abolished capsulation in 1B4  
143 (ref. 9). We set out to manipulate ribosome concentration in 1B4 in order to test directly if  
144 ribosome abundance affects capsulation.

145 *P. fluorescens* SBW25 harbours five copies of *rrn* (*rrnA-E*). Because deletion of a single *rrn*  
146 operon can often be compensated by over-expression of those remaining<sup>14-16</sup> capsulation  
147 was quantified in both single and double *rrn* deletion mutants using the chromosomally-  
148 inserted translational reporter *Ppflu3655*-GFP (ref. 9). Whereas single mutants were not  
149 significantly affected in capsulation status, double mutants produced fewer capsulated cells  
150 (Fig. 2a and Supplementary Figure 5). Growth rate was only marginally affected in certain  
151 mutant combinations (Supplementary Figure 6) but a significant reduction in total RNA  
152 content was observed in three out of the six *rrn* double mutants (Supplementary Figure 7).  
153 Together, these results show that capsulation is positively affected by increased ribosome  
154 abundance, which is itself a response to pyrimidine starvation .

155

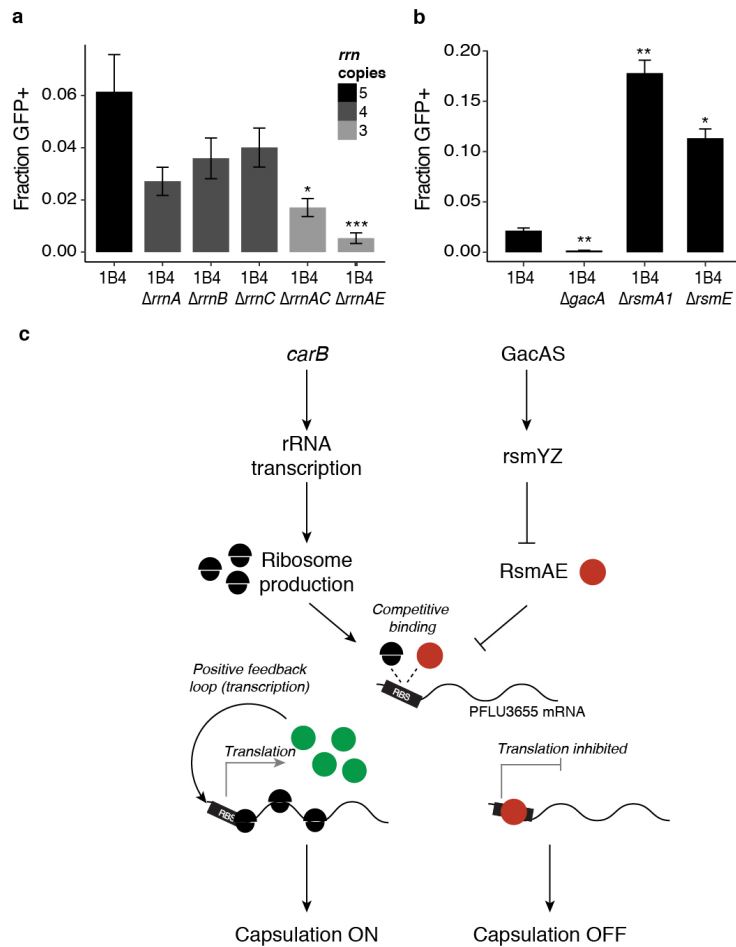

156

157 Figure 2: Genetic bases of capsulation

158 **a**, Capsulation in the *rrn* deletion mutants. The Tn7-*Ppflu3655*-GFP reporter was introduced in 1B4  
 159 bacteria and its derived *rrn* mutants. Capsulation was measured by quantifying the proportion of GFP  
 160 positive cells by flow cytometry at the onset of stationary phase ( $OD_{600nm} = 1-2$ ). Means  $\pm$  s.e.m. are  
 161 shown,  $n = 8$  (1B4  $\Delta rrnB$ ) or  $n = 11$  (all other strains). Data are pooled from 4 independent  
 162 experiments. \*\*  $P < 0.01$ , \*\*\*  $P < 0.001$ , Kruskal-Wallis test with Dunn's post-hoc correction,  
 163 comparison to 1B4. **b**, Capsulation in *gac/rsm* mutants. Means  $\pm$  s.e.m. are shown,  $n = 12$  (1B4),  $n = 15$   
 164 (1B4  $\Delta gacA$ ) or  $n = 9$  (all other strains). Data are pooled from 3 independent experiments. \*  $P < 0.05$ ,  
 165 \*\*\*  $P < 0.001$ , Kruskal-Wallis test with Dunn's post-hoc correction, comparison to 1B4. **c**, A model for  
 166 capsulation in 1B4. See text for details.

167

### 168 **A ribosome-Rsm competition model for the control of capsulation**

169 Next, we asked how ribosome abundance influences heterogeneous production of  
 170 capsulated cells. Results from a previous transposon mutagenesis screen showed that the  
 171 Gac/Rsm two-component signalling pathway is required for production of colanic acid-like  
 172 capsules<sup>9</sup>. The Gac/Rsm signalling pathway controls important ecological traits in many  
 173 Gram-negative bacteria, including secretion of exoproducts, the transition between biofilm  
 174 and planktonic cells and pathogenicity<sup>17,18</sup>. Its activity is mediated through post-

175 transcriptional regulators of the Csr/Rsm family that prevent translation of mRNA targets by  
176 binding to sites adjacent to or overlapping ribosome-binding sites (RBS)<sup>17,19</sup>. Upon  
177 perception of unknown extracellular signals<sup>18</sup>, the sensor kinase GacS activates the cognate  
178 response regulator GacA and the transcription of small non-coding RNAs *rsmY* and *rsmZ*.  
179 Binding of these sRNAs to Csr/Rsm proteins antagonizes their translation inhibition activity.  
180 Three Csr/Rsm homologs are present in SBW25 and were named *rsmA1* (*PFLU4746*), *rsmA2*  
181 (*PFLU4324*) and *rsmE* (*PFLU4165*). The phenotypic effect of the Gac/Rsm pathway was  
182 investigated by creating deletion mutants for the response regulator *gacA* and the two  
183 Csr/Rsm homologs *rsmA1* and *rsmE*. Capsulation was completely abolished in a *gacA*  
184 deletion strain, confirming the transposon-mutagenesis results (Fig. 2b). Deletion of *rsmA1*  
185 or *rsmE* increased the production of capsulated cells, consistent with their typical inhibitory  
186 role in Gac/Rsm signalling pathways.

187 We postulated that variations in the relative concentration of free ribosomes and RsmA/E  
188 may determine translational output of a key positive regulator of capsule biosynthesis (Fig.  
189 2c). While searching for such a regulator, attention turned to *PFLU3655*. The first gene of a  
190 putative operon (*PFLU3655-3657*) localized just upstream of the colanic acid biosynthetic  
191 operon, *PFLU3655* is annotated as a hypothetical protein carrying a two-component  
192 response regulator C-terminal domain (PFAM PF00486). *PFLU3655* is among the most highly  
193 up-regulated genes in 1B4 Cap<sup>+</sup> cells and transposon insertions in its promoter were shown  
194 to abolish capsulation in 1B4 (ref. 9). A non-polar deletion of *PFLU3655* in 1B4 abolished  
195 capsule formation, while complementation of the mutant with an IPTG-inducible copy of  
196 *PFLU3655* on a low copy number plasmid (pME6032) restored capsulation (Fig. 3a). Over-  
197 expression of *PFLU3655* in SBW25 or 1B4 led to high capsulation levels in these strains,  
198 showing that *PFLU3655* is a key positive regulator of colanic acid biosynthesis, the  
199 expression of which is sufficient for capsulation. Moreover, ectopic expression of *PFLU3655*  
200 induces expression from its own promoter, as measured using the chromosomally-encoded  
201 *Ppflu3655*-GFP translational fusion (Fig. 3b). This result shows that *PFLU3655* expression can  
202 generate a positive feedback loop, a motif that can sustain bistable gene expression<sup>20,21</sup>.



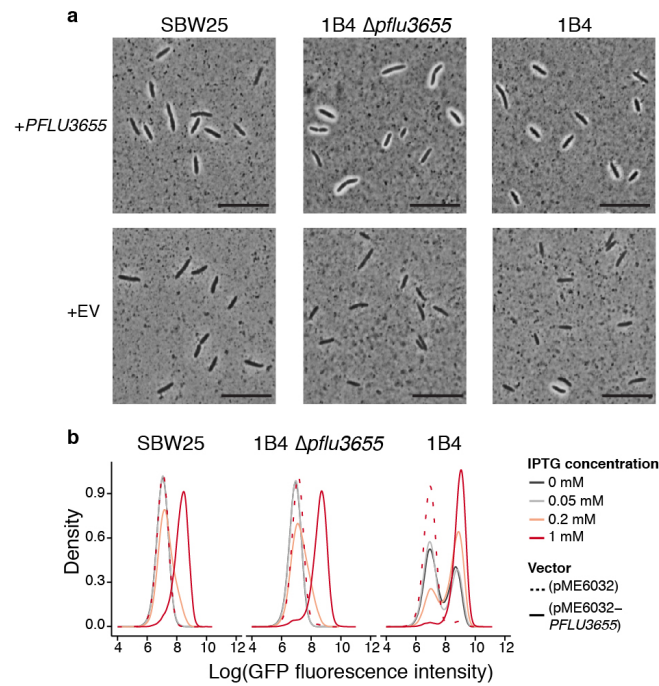

203

204 Figure 3: PFLU3655 is required for capsulation

205 **a**, Capsulation in SBW25, 1B4  $\Delta pflu3655$  and 1B4 strains carrying the pME6032-*pflu3655* plasmid or  
206 the empty vector (EV) after induction with 1mM IPTG. Phase contrast microscopy images of bacterial  
207 suspensions counter-stained with indian ink. White halos around cells indicate capsulation. Scale bar  
208 = 10  $\mu$ m. **b**, PFLU3655 establishes a positive feedback loop. GFP fluorescence from the *Ppflu3655*-GFP  
209 reporter in SBW25 (left), 1B4  $\Delta pflu3655$  (middle) or 1B4 (right) cells carrying the pME6032-*pflu3655*  
210 plasmid or empty vector and *pflu3655* expression was induced with IPTG at indicated concentration  
211 and fluorescence was measured by flow cytometry. Data are representative of 3 independent  
212 experiments (**a**, **b**).

213

214 Existence of a positive feedback loop does not however guarantee bistability, which often  
215 requires the additional presence of an ultrasensitive switch to convert small input deviations  
216 (typically, molecular noise) into large output differences<sup>22</sup>. When signalling components are  
217 present in large numbers, ultrasensitive responses and threshold effects can arise through  
218 molecular titration where a molecule (RNA or protein) is sequestered and inhibited by  
219 another protein<sup>22-25</sup>. This led to recognition that titration by RsmA/E may be involved in  
220 phenotypic bistability.

221 Two putative Rsm binding sites are located in the promoter and 5' region of the coding  
222 sequence of *PFLU3655* (Fig. 4a), indicating that PFLU3655 mRNA could be a direct target of  
223 RsmA/E. The *Ppflu3655*-GFP capsulation reporter was used to test this hypothesis. This  
224 translational reporter contains ~500 nucleotides upstream of the PFLU3655 start codon with  
225 the first 39 coding nucleotides being fused in frame to GFP; the two putative RsmA/E binding  
226 sites are conserved in this synthetic construct. Using site-directed mutagenesis, nucleotides

227 located in the putative Rsm binding sites were substituted and effects on GFP expression in  
 228 the *Ppflu3655*-GFP reporter strain determined (Fig. 4a,b). Both G-8A and A33T point  
 229 mutations increased GFP production, albeit to different extents, consistent with the  
 230 expected effects arising from reduction in binding of an inhibitor. Altering the putative RBS  
 231 (GG-7AC) completely abolished GFP expression (Fig. 4b), which is similarly to be expected  
 232 given the need for translation.

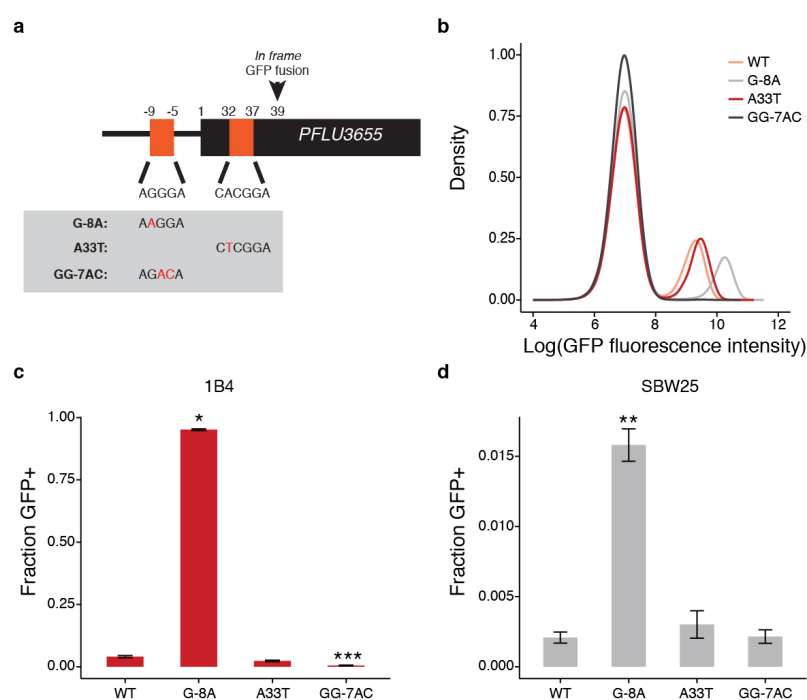

233

234 Figure 4: RsmA/E binding sites in *PFLU3655* control capsulation

235 **a**, Schematic diagram of *PFLU3655* region. Two putative RsmA/E binding sites (orange squares) are  
 236 located in the promoter and 5' region of the gene. Numbers indicate nucleotide positions relative to  
 237 start codon (not to scale). Sequences of putative RsmA/E binding sites are shown, the putative  
 238 ribosome-binding site (RBS) is underlined. Grey box: point mutations introduced in the different  
 239 sequences by site-directed mutagenesis. **b**, Expression of the *Ppflu3655*-GFP reporter carrying the  
 240 different point mutations in the 1B4 background. GFP fluorescence was measured by flow cytometry.  
 241 Data are representative of 3 independent experiments. **c-d**, Mutations in putative RsmA/E binding  
 242 sites affect capsulation in 1B4 (**c**) and SBW25 (**d**). Individual point mutations were re-introduced into  
 243 1B4 and SBW25 carrying the wild-type *Ppflu3655*-GFP reporter and the proportion of GFP positive  
 244 cells in late exponential phase ( $OD_{600nm} = 1-2$ ) was measured by flow cytometry. Means  $\pm$  s.e.m. are  
 245 shown,  $n = 9$  (1B4) or  $n = 7$  (SBW25). Data are pooled from 3 independent experiments. \*  $P < 0.05$ , \*\*  
 246  $P < 0.01$ , \*\*\*  $P < 0.001$ , Kruskal-Wallis test with Dunn's post-hoc correction, comparison to 1B4.

247

248 To determine effects on capsulation, the individual point mutations were re-introduced at  
 249 the native locus in 1B4 and SBW25. The G-8A mutation, but not the A33T mutation,  
 250 increased the proportion of capsulated cells in both strains (Fig. 4c, d). This difference  
 251 mirrors the difference observed on expression of GFP and suggests that the increase in

252 PFLU3655 translation mediated by the A33T mutation is not sufficient to increase the  
253 likelihood to jump-start the positive feedback loop, contrary to G-8A.

254 Together, these data support the model proposed earlier (Fig. 2c). If this model is correct,  
255 one would expect other RsmA/E targets to be over-expressed in *carB* mutants. A list of  
256 genes that were differentially expressed in a SBW25 *gacS* mutant<sup>26</sup> was extracted and their  
257 expression levels were compared using the RNAseq dataset. On average, genes that were  
258 up-regulated in the *gacS* mutant were expressed at lower levels in 1B4 (both Cap<sup>-</sup> and Cap<sup>+</sup>)  
259 than in SBW25 or 1A4 (Supplementary Figure 8). Genes that were down-regulated in *gacS*  
260 showed a slight bias towards higher expression in 1B4 Cap<sup>+</sup> but this difference was not  
261 statistically significant. These results are consistent with the opposing effects of *gacS*  
262 inactivation (leading to constitutive activation of RsmA/E) and *carB*-dependent increase in  
263 ribosome concentration on RsmA/E targets.

264

#### 265 **A qualitative mathematical model of post-transcriptional control of a positively regulated** 266 **gene**

267 We produced a mathematical model based on our experimental observations in order to  
268 describe the qualitative behaviour of the cells, notably bistability of the internal state, and to  
269 predict how the explored changes in the regulation pathways are likely to affect the fraction  
270 of capsulated cells.

271 An ordinary differential equation for the concentration of mRNA transcribed from *PFLU3655*  
272 formalizes the two hypotheses that transcription is positively regulated by the protein  
273 PFLU3655 concentration, and that ribosomes and the regulator RsmA/E compete for a  
274 binding site on the mRNA (Supplementary Note). The model, illustrated in Figure S1 from  
275 Supplementary Note, describes the dynamics of three mRNA pools: free, bound to  
276 ribosomes (thus translated) and bound to the regulator. Modifications in total ribosome  
277 concentration, in the rate of basal mRNA production, and in regulator binding efficiency can  
278 be included in this model in the form of parameter changes. By studying their effect on the  
279 system dynamics, and in particular its equilibria, the model can be used to check whether  
280 the hypotheses formulated previously on ribosome-mediated translational regulation are  
281 consistent with experimental observations.

282 Like other systems where post-transcriptional control is mediated by regulators acting as  
283 mRNA 'sponges', molecular titration introduces nonlinearities that can give rise to

284 bistability<sup>22-25</sup>. When the system is bistable, an 'OFF' equilibrium, where the gene is not  
285 translated, coexists with an 'ON' equilibrium, where the protein, thus the fluorescent  
286 reporter, are produced. The level of protein expression in this second equilibrium is set by  
287 saturation of the transcription rate with increasing protein concentration. These two stable  
288 equilibria are separated by a third unstable equilibrium – whose position depends on all the  
289 parameters of the system – which sets the protein concentration threshold for mRNA  
290 translation to overcome sequestration by the regulator. Assuming that the transition  
291 between the two alternative states takes place due to stochastic processes at the molecular  
292 level, extension of the basin of attraction of either stable equilibrium can be taken as a proxy  
293 of the probability of observing cells in the corresponding state.

294 As shown in Figure S2 from Supplementary Note, the model reproduces the qualitative  
295 modifications observed experimentally: the entry into a bistable regime when ribosome  
296 levels increase (hence the difference between SBW25 and 1B4 strains), and the increase  
297 both in the capsulation probability and in the protein levels when either a second,  
298 unregulated, source of mRNA production is added, or the binding affinity of the regulator is  
299 reduced. As a corollary of our model ribosome levels are expected to be heterogeneous in  
300 the population with capsulated cells having an increased average ribosome content with  
301 respect to non-capsulated cells. Indeed, RNAseq data indicate that ribosomal protein genes  
302 are expressed at higher levels in 1B4 Cap<sup>+</sup> compared to 1B4 Cap<sup>-</sup> (Fig. 1a).

303

#### 304 **Consequences of ribosome heterogeneity on growth resumption in capsulated cells**

305 When the quality and/or quantity of nutrients rises abruptly, differences in ribosome  
306 abundance can be significant for bacterial fitness<sup>27</sup>. Reaching higher ribosome  
307 concentrations – required for maximal growth rate after nutrient up-shift – is time-  
308 consuming and introduces a time-delay between environment change and future growth<sup>28</sup>.  
309 Cells with higher ribosome concentrations before nutrient up-shift might be considered as  
310 having been provisioned for rapid acclimation to the new conditions. If it is true that  
311 ribosomes promote growth resumption after nutrient up-shift, then capsulated cells should  
312 have an average growth advantage under these conditions. To test this prediction, 1B4 cells  
313 grown to late exponential phase ( $OD_{600nm} \sim 1$ ) and cell suspensions enriched in Cap<sup>-</sup> or Cap<sup>+</sup>  
314 cells were used to inoculate fresh cultures. The initial growth rate after nutrient up-shift in  
315 batch cultures was positively correlated with the proportion of capsulated cells (Fig. 5a).  
316 Time-lapse microscopy on solid agar pads confirmed that colonies founded by GFP<sup>+</sup>

317 (capsulated) cells grew approximately 10% faster than those originating from GFP<sup>-</sup> (non-  
318 capsulated) cells (Fig. 5b).

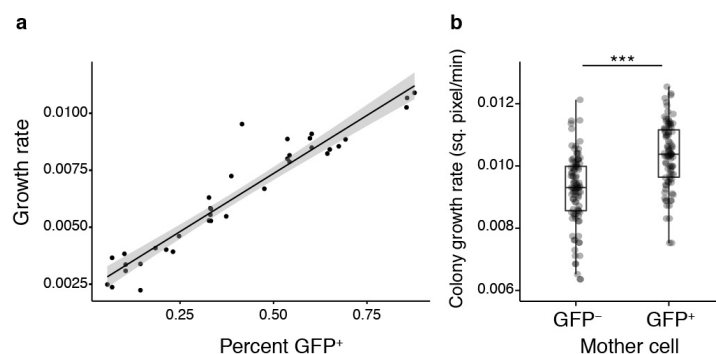

319

320 Figure 5: Capsulation and growth in 1B4

321 **a**, Initial growth rate after nutrient upshift is correlated to the proportion of capsulated cells in 1B4  
322 populations. Data points are pooled from 2 independent experiments.  $n = 36$ ,  $r^2 = 0.91$ . Shaded area  
323 indicates 95% confidence interval. **b**, Growth rate of micro-colonies founded by Cap<sup>-</sup> (GFP<sup>-</sup>) or Cap<sup>+</sup>  
324 (GFP<sup>+</sup>) cells measured by time-lapse microscopy.  $n = 97$  (GFP<sup>-</sup>) or  $n = 94$  (GFP<sup>+</sup>). Data are pooled from  
325 7 independent experiments. \*\*\*  $P < 0.001$ , two-tailed  $t$ -test

326

### 327 **Capsulation in SBW25**

328 Identification of the mechanism promoting production of colanic acid capsules in the  
329 derived 1B4 switcher genotype raises questions as to the role and conditions for expression  
330 of colanic acid in ancestral SBW25. In bacteria, extracellular capsules are important for  
331 bacterial pathogenicity<sup>29</sup> and are associated with broader environmental versatility<sup>30</sup>. Recent  
332 work has also demonstrated a role for colanic acid-like capsules in the positioning of cells at  
333 the surface of bacterial colonies, providing access to oxygen and a fitness advantage<sup>31,32</sup>.

334 In order to test if capsulation occurs in ancestral SBW25 colonies, we spot-inoculated  
335 bacterial suspensions on agar plates with incubation at 28°C for several days. Mucoïd  
336 papillations were observed in the centre of colonies from 5 days post-inoculation and  
337 increased over time (Fig. 6a). These papillations were not observed in colonies derived from  
338 a colanic acid mutant (data not shown) and their appearance was delayed when 2mM uracil  
339 was added to agar plates (Fig. 6b). In SBW25, cells sampled from mucoïd regions showed a  
340 high proportion of capsulated cells, approximately 60% of which expressed the *Ppflu3655*-  
341 GFP reporter (Fig 6c). The fact that some capsulated cells do not express the GFP reporter in  
342 old colonies may result from remanence of capsules around cells that have stopped  
343 production, and/or from a possible PFLU3655-independent capsulation program. When  
344 streaked on new agar plates, no phenotypic difference was observed in colonies arising from

345 mucooid versus non-mucooid cells (data not shown), indicating that mucoidy is not dependent  
346 on *de novo* mutation. These results indicate that capsulation in starved SBW25 colonies is  
347 also a consequence of bistable colanic acid production.

348 Given previous results with 1B4, we reasoned that capsulated SBW25 cells might also  
349 benefit from a growth advantage upon exposure to rich medium. Cells were collected from  
350 7-day old colonies and enriched in capsulated or non-capsulated cells by gentle  
351 centrifugation. When transferred to fresh batch cultures, cell suspensions enriched in  
352 capsulated cells showed a faster initial growth rate (Supplementary Figure 9). To directly  
353 measure the fitness effect of capsulation during growth resumption, cellular suspensions  
354 from colonies of SBW25 or its isogenic variant carrying a neutral *lacZ* marker<sup>33</sup> were  
355 collected. SBW25 Cap<sup>-</sup> cells were mixed with SBW25-*lacZ* Cap<sup>+</sup> cells, and *vice versa*, to  
356 initiate competition experiments. A significant fitness advantage of capsulated cells was  
357 detected after 2h or 4h growth in KB medium (Fig. 6d). Finally, time-lapse microscopy  
358 experiments revealed that micro-colonies founded by GFP<sup>+</sup> cells display an initial growth  
359 rate significantly higher than colonies arising from GFP<sup>-</sup> cells (Fig 6e).

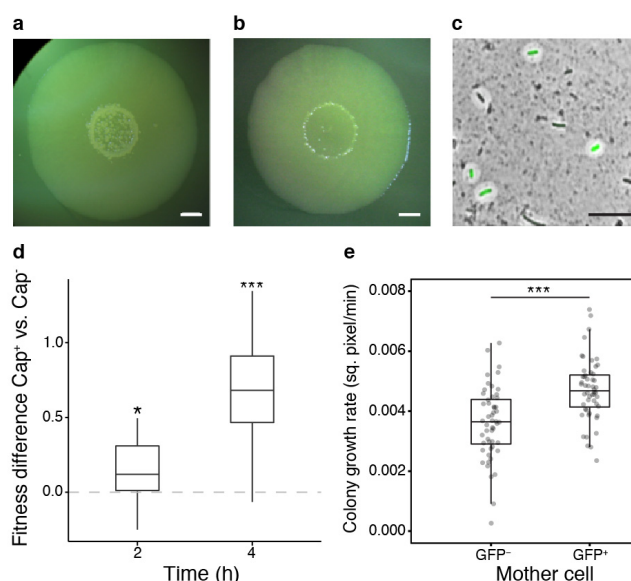

360

361 Figure 6: Capsulation and growth in SBW25

362 **a-b**, SBW25 colony grown on KB agar plate **(a)** or KB agar plate supplemented with 2 mM uracil **(b)** for  
363 7 days. Scale bar = 2 mm. **c**, SBW25 cells carrying the Tn7-*Ppfl3655*-GFP reporter and sampled for a  
364 7-day old colony were counter-stained with indian ink to detect the presence of colanic acid capsules.  
365 A GFP image are overlaid with the phase contrast image. Scale bar = 10  $\mu$ m. Images are  
366 representative of at least 3 independent experiments **(a-c)**. **d**, Competitive fitness difference between  
367 SBW25 Cap<sup>-</sup> and Cap<sup>+</sup> cells. Boxplot of the differences in Malthusian parameters between cultures  
368 enriched in Cap<sup>+</sup> vs. Cap<sup>-</sup> cells are shown, n = 12. Data are pooled from 2 independent experiments. \*  
369  $P < 0.05$ , \*\*\*  $P < 0.001$ , comparison to 0 with two-tailed *t*-test. **e**, Initial growth rate of micro-colonies

370 founded by GFP<sup>-</sup> or GFP<sup>+</sup> cells measured by time-lapse microscopy. n = 65. Data are pooled from 4  
371 independent experiments. \*\*\*  $P < 0.001$ , Wilcoxon test.

372

373 To test if capsulation status in SBW25 is also associated with higher average ribosome  
374 content, we measured expression of the ribosomal protein gene *rpsL* in capsulated and non-  
375 capsulated cells originating from old SBW25 colonies by RT-qPCR. We found an expression  
376 ratio of 1.67 (+/- 0.35 s.d., n = 5, two-tailed *t*-test,  $P = 0.012$ ) in Cap<sup>+</sup> vs. Cap<sup>-</sup> cells, suggesting  
377 that SBW25 capsulated cells contain on average more ribosomes than their non-capsulated  
378 counter-parts.

379 Overall, the results from experiments carried out in SBW25 are consistent with the  
380 capsulation model proposed for 1B4. During 'long-term' (*i.e.*, 7 days) starvation, nutrient  
381 limitation (possibly triggered by a reduction in flux through the pyrimidine pathway) causes  
382 a shift towards increased ribosome content. Cells with higher ribosome levels have an  
383 enhanced chance of flipping to the capsulated state where growth remains slow and cells  
384 enter a semi-quiescent state. Even though giving up competition for nutrients in stationary  
385 phase, these cells then stand primed for rapid growth upon nutrient upshift.

386

### 387 **Discussion:**

388 Studies of adaptive phenotypes derived from selection experiments are by nature  
389 multifaceted, but two parallel lines of inquiry are of particular importance. The first concerns  
390 the nature of the adaptive phenotype, including its selective and molecular causes. The  
391 second concerns the ecological significance of the traits affected by adaptive evolution, prior  
392 to the occurrence of the adaptive mutation(s). A satisfactory answer to the first requires  
393 understanding of the latter.

394 Early characterisation of the 1B4 switching genotype<sup>8</sup> showed the behaviour to be a  
395 consequence of a single non-synonymous nucleotide substitution in carbamoyl phosphate  
396 synthase *carB*. In and of itself discovery of the causal switch-generating mutation shed no  
397 light on the adaptive phenotype. Understanding began to emerge only upon recognition  
398 that the *carB* mutation had altered the activation threshold of a pre-existing switch<sup>9</sup>. Here  
399 we have substantially extended understanding of the mechanistic bases of phenotypic  
400 switching in the derived 1B4 genotype.



401 Experiments examining function of the bistable behaviour in a *galU* mutant of the 1B4  
402 switcher showed that previous conclusions concerning the central role of UTP or related  
403 molecules required revision. While pyrimidine biosynthesis and the UTP decision point are  
404 important components of the pathways leading to capsulation, the mechanism of switching  
405 resides elsewhere. Data presented here have led to formulation of a compelling new model  
406 of the switch. Central to the proposed model (Fig. 2c) is competition between RsmA/E and  
407 ribosomes for *PFLU3655* mRNA, a positive regulator of capsulation. That translation  
408 initiation and/or efficiency may affect signaling through the GacAS two-component system  
409 was previously suggested in two independent studies<sup>34,35</sup>.

410 Importantly, in our model, titration of *PFLU3655* mRNA by RsmA/E has the potential to  
411 generate bistability. An increase in ribosome production resulting from the *carB* mutation  
412 leads the system to a bistable regime. Small fluctuations in ribosome and/or in RsmA/E  
413 activities beyond an activation threshold initiate a positive feedback loop leading to  
414 capsulation. The position of the threshold and the consequent probability of switching are  
415 affected by even small changes in parameters of the system. The prevalence of inhibitory  
416 interactions in signaling networks offers a common route for the evolution (or evolutionary  
417 tuning) of bistable switches through relatively minor changes to the basal level or the  
418 interaction affinity of threshold-defining components<sup>6,23,36</sup>. Bimodal expression of GacAS-  
419 regulated genes has been observed in *Pseudomonas aeruginosa*<sup>37</sup> and the relevance of  
420 ribosome-mediated heterogeneity for numerous two-component signaling pathways  
421 involving RNA-binding proteins deserves further attention. Such regulatory strategies would  
422 enable bacterial cells to couple their internal metabolic and physiological status to multiple  
423 signaling outputs. Heterogeneity in persister resuscitation in *E. coli* was recently shown to  
424 correlate with ribosome content<sup>38</sup> and provides a further example of the association  
425 between ribosomes and phenotypic heterogeneity.

426 A remaining open question is the mechanistic link between pyrimidine starvation and  
427 ribosome biosynthesis. While the stringent response is believed to tune ribosome  
428 production to cellular needs<sup>39</sup>, a phenomenon of ribosome over-capacity – bearing similarity  
429 to what we describe as ‘ribosome provisioning’ – was previously reported in slow growing  
430 bacteria<sup>40-42</sup> and occurs concomitantly with a reduction in the rate of translation (or  
431 accumulation of inactive ribosomes). RelA-dependent production of ppGpp was shown to be  
432 necessary for ribosome accumulation under nitrogen starvation<sup>42</sup>, but a *relA spoT* mutant of  
433 genotype 1B4 was unaffected in its capacity to switch (data not shown). It is possible that in



434 1B4 an imbalance in the nucleotide pool – a factor known to influence ribosome production  
435 in *E. coli*<sup>43</sup> – may directly alter ribosome production.

436 *In vitro* selection experiments can shed light on hitherto unrecognized aspects of bacterial  
437 physiology<sup>44-49</sup>. Understanding the evolutionary origin of the switch between cells with  
438 differing capsulation states requires understanding of the function and ecological  
439 significance of the switch in the ancestral genotype. Previous work showed that switching to  
440 the capsulated type was accompanied by a reduction in growth rate and that the probability  
441 of switching to the capsulated state was more likely in starved cells (particularly in cells  
442 starved of pyrimidines). This was understood as a mechanism that allowed cells entering  
443 starvation conditions to hedge their bets in the face of uncertainty surrounding the future  
444 state of the environment<sup>9</sup>. Discovery that capsulated cells, despite slow growth, are replete  
445 in ribosomes was perplexing, but caused attention to focus on exit from the semi-quiescent  
446 state. Just as cells entering a slow growing phase stand to be out-competed by conspecific  
447 types that remain in the active growth phase should the environment unexpectedly return  
448 to one conducive for growth, cells exiting from a slow growth state stand to be out-  
449 competed by types that are already actively growing unless they can rapidly resume “life in  
450 the fast lane”. This phenomenon that we refer to as ‘ribosome provisioning’ has parallels  
451 with recent reports of ribosome dynamics in exponentially growing cells<sup>27,50,51</sup>. In  
452 environments where resource availability fluctuates, it appears that the control of ribosome  
453 biosynthesis is subject to a trade-off between maximising growth rate during nutrient  
454 limitation and growth resumption upon nutrient up-shift. This trade-off may be solved at the  
455 single-cell level, where heterogeneity in ribosome activity may contribute to optimize long-  
456 term geometric mean fitness.

457 Although the subject of little attention in the microbiological world (but see refs. 27, 51, 52)  
458 ideas concerning provisioning of future generations with resources sufficient to aid their  
459 establishment is a component of life-history evolution theory<sup>53</sup>. It has been particularly well  
460 developed in the context of seed dormancy and the evolution of post-germination traits<sup>54</sup>. It  
461 is not difficult to conceive that bacterial cells entering a slow or non-growing state, such as  
462 persists, or the capsulated cells of SBW25, will through evolutionary time, experience  
463 selection for mechanisms that facilitate rapid re-entry to active growth. Our data here is  
464 suggestive of such an evolutionary response.

465

466 **Material and methods:**

467 *Bacterial strains and growth conditions*

468 Bacterial strains used in this study are listed in Supplementary Table 1. *Pseudomonas*  
469 *fluorescens* strains were cultivated in King's Medium B (KB; ref. 55) at 28°C. *Escherichia coli*  
470 DH5 $\alpha$   $\lambda$ pir was used for cloning and was grown on Lysogeny Broth at 37°C. Bacteria were  
471 plated on their respective growth media containing 1.5% agar. Antibiotics were used at the  
472 following concentrations: ampicillin (50-100  $\mu$ g mL<sup>-1</sup>), gentamicin (10  $\mu$ g mL<sup>-1</sup>), tetracycline  
473 (10  $\mu$ g mL<sup>-1</sup>), kanamycin (25 or 50  $\mu$ g mL<sup>-1</sup> for *E. coli* or *P. fluorescens*, respectively) and  
474 nitrofurantoin (100  $\mu$ g mL<sup>-1</sup>). Uracil (Sigma-Aldrich) was added to culture medium at 2 mM  
475 final concentration when indicated. For competition experiments, 5-bromo-4-chloro-3-  
476 indolyl- $\beta$ -d-galactopyranoside (X-gal) was used at a concentration of 60 mg L<sup>-1</sup> in agar plates.

477 For capsulation assays, pre-cultures were inoculated from pre-calibrated dilutions of frozen  
478 glycerol aliquots in order to reach an OD<sub>600nm</sub> of 0.3-0.5 after overnight culture.

479 For colony assays with SBW25, 5  $\mu$ l of cell suspensions were spot-inoculated on KB agar  
480 plates and incubated for 7 days at 28°C. Cells from the center of these colonies were  
481 resuspended in PBS or Ringer's solution for growth and competition assays and time-lapse  
482 microscopy, or in RNAlater solution (Invitrogen) for RT-qPCR.

483

484 *Molecular techniques*

485 Oligonucleotides and plasmids used in this study are listed in Supplementary Tables 2 and 3,  
486 respectively. Standard molecular biology techniques were used for DNA manipulations<sup>56</sup>.  
487 DNA fragments used to generate promoter fusions and gene deletion constructs were  
488 prepared by splicing by overhang extension polymerase chain reaction (SOE-PCR; ref. 57). All  
489 DNA fragments generated by SOE-PCR were first cloned into the pGEM-T easy vector  
490 (Promega) and their fidelity was verified by Sanger sequencing (Macrogen, Seoul). Plasmids  
491 were introduced into *P. fluorescens* by tri-parental conjugations with the helper plasmid  
492 pRK2013 (ref. 58), carrying the *tra* and *mob* genes required for conjugation. Tn7-based  
493 plasmids were mobilized into recipient strains with the additional helper plasmid pUX-BF13  
494 (ref. 59).

495 To generate deletion mutants (*rrn* operons, *gacA*, *rsmA*, *rsmE* and *pflu3655*), regions  
496 flanking the genes or operons of interest were amplified from SBW25 genomic DNA and  
497 assembled by SOE-PCR. Deletion cassettes were inserted into the pUIC3 plasmid<sup>60</sup> as *SpeI*  
498 fragments and mutants were obtained following the two-step allelic exchange protocol

499 described previously<sup>33</sup>. Deletion mutants were checked by PCR. To check *rrn* copy number  
500 after *rrn* deletions, quantitative PCR was performed using a protocol described previously<sup>61</sup>.  
501 For complementation and over-expression studies, *PFLU3655* was amplified and cloned into  
502 pME6032 (ref. 62) as an *EcoRI/XhoI* restriction fragment, downstream of the *Ptac* promoter.  
503 To generate the Tn7-*PrrnB*-GFP reporter, a ~600bp fragment upstream of the *rrnB* operon  
504 (*PFLUr7-11*) was amplified from SBW25 genomic DNA and fused by SOE-PCR to *gfpmut3*  
505 sequence containing the T0 terminator previously amplified with oPR152/FluomarkerP2  
506 from the miniTn7(Gm)-*PrrnB1-gfpmut3* plasmid<sup>63</sup>. The resulting fragment was cloned into  
507 pUC18R6K-mini-Tn7T-Gm (ref. 64) as a *SpeI* restriction fragment.

508 Site-directed mutagenesis of putative RsmA/E binding sites in pGEMT easy-*Ppflu3655*-GFP  
509 plasmid was performed using the Quick Change mutagenesis kit (Stratagene) according to  
510 manufacturer's instructions. Mutagenized fragments were then cloned into pUC18R6K-  
511 miniTn7T-Gm (ref. 64) as a *SpeI* restriction fragment. In order to re-engineer point mutations  
512 in RsmA/E into the *Pseudomonas fluorescens* genome, a 1.5kb fragment spanning equal  
513 length on each side of the target sites was amplified and cloned into pGEM-T easy vector.  
514 Site-directed mutagenesis was performed on this plasmid as described above, and the  
515 resulting DNA fragments were cloned in pUIC3 as *SpeI* restriction fragments and introduced  
516 into the *P. fluorescens* genome *via* the two-step allelic exchange protocol.

517

#### 518 *RNA extractions and RT-qPCR*

519 For quantification of RNA concentration in bacterial cultures, cells were harvested from 1 ml  
520 of cultures at OD<sub>600nm</sub> of 0.5-0.6 and resuspended in 200 µl of RNAlater solution (Invitrogen).  
521 For total RNA quantification, we followed the method described by ref. 65, except that,  
522 before processing, cells cultures were resuspended in RNAlater (Invitrogen) instead of being  
523 fast frozen on dry ice. To normalise total RNA concentrations, the relationship between cell  
524 density and OD<sub>600nm</sub> was established for each strain by counting cells with a hemocytometer  
525 in 5 independent cultures of similar OD to those used for RNA extractions. For *rrn* double  
526 mutants, no significant difference in the cell/OD<sub>600nm</sub> ratio was found when compared to  
527 1B4, so RNA quantities were normalised with OD<sub>600nm</sub> values.

528 Reverse-transcription quantitative PCR was performed as described previously<sup>61</sup>, using *gyrA*  
529 as an internal control. Oligonucleotide primers used for RT-qPCR are listed in Supplementary  
530 Table 2.

531

532 *Capsulation and gene expression assays*

533 For capsulation tests, cells were grown from standardized glycerol aliquots stored at -80°C.  
534 Aliquots were diluted in KB and pre-cultures were grown overnight in order to reach an  
535 OD<sub>600nm</sub> of 0.3-0.5 in the morning. For gene expression studies, overnight pre-cultures were  
536 grown to saturation. In both cases, pre-cultures were diluted to OD<sub>600nm</sub> of 0.05 in KB and  
537 incubated at 28°C. IPTG was added to a final concentration of 0.1-1mM when indicated.  
538 Samples were taken at different time points for flow cytometry and OD measurements. GFP  
539 fluorescence in bacterial populations was measured with a BD FACS Canto II flow cytometer.  
540 Cell suspensions were diluted to a density of ~ 10<sup>5</sup> cells ml<sup>-1</sup> in filter-sterilised PBS and at  
541 least 20,000 cells were analysed by flow cytometry. Cellular debris were filtered using side-  
542 scatter channel (SSC-H/SSC-W). GFP fluorescence was detected with a 488 nm laser with  
543 530/30 bandwidth filter. Laser intensity was set to 600V, except for *PrrnB*-GFP analyses  
544 where intensity was lowered to 300V. Flow cytometry data files were analysed in R (ref. 66)  
545 using the 'flowCore' package<sup>67</sup>. For capsulation experiments, the relative sizes of GFP  
546 positive and negative sub-populations were measured after manual thresholding of GFP  
547 intensity, following bi-exponential transformation of the FITC-H signal. The distributions of  
548 expression intensities in Figures 3b. and 4b. were smoothed in R using the 'KernSmooth'  
549 package<sup>68</sup>.

550

551 *Growth curves in microplate reader*

552 Overnight precultures were adjusted to OD<sub>600nm</sub> of 0.05 and 200 µl KB cultures were grown in  
553 96-well plates. Cultures were incubated in a Synergy 2 microplate reader (Biotek) for at least  
554 24h at 28°C with constant shaking and OD<sub>600nm</sub> was read every 5 minutes.  
555 To measure growth rates of cultures enriched in capsulated or non-capsulated cells, cells  
556 were harvested from late-exponential phase (OD<sub>600nm</sub> ~ 1; 1B4) or 7-day old colonies  
557 (SBW25) and centrifuged (1 min, 3000 rpm). Supernatants and pellets were collected,  
558 representing sub-populations enriched in capsulated and non-capsulated cells, respectively.  
559 Cell suspension density was adjusted to OD<sub>600nm</sub> of 0.05 in KB to start growth curves. Initial  
560 growth rates were calculated by performing a linear regression on the logarithm of the  
561 measure OD values during the first 2h of growth.

562

563 *Microscopy*

564 Microscopy experiments were performed with an Olympus BX61 upright microscope  
565 equipped with an F-View II monochrome camera, a motorized stage and a temperature-  
566 controlled chamber set at 28°C. Devices were operated by the Cell<sup>^</sup>P or CellSens softwares  
567 (Olympus). Phase-contrast images were acquired with an oil-immersion 100x/N.A. 1.30  
568 objective. GFP fluorescence images were acquired with the following filter set: excitation  
569 (460-480 nm), emission (495-540 nm) and dichroic mirror (DM485).

570 Indian ink staining of capsulated cells was performed as described previously<sup>9</sup>. To determine  
571 cell size, exponentially growing bacteria were diluted 1:10 in KB and transferred on 1%  
572 agarose-KB gel pads. Cell sizes were determined from phase-contrast images with MicrobeJ  
573 (ref. 69). For time-lapse microscopy, bacteria were harvested from late exponential phase  
574 (1B4,  $OD_{600nm} \sim 1-2$ ) or from 7 day-old colonies (SBW25), diluted 1:1000 in KB and 2 $\mu$ l of the  
575 resulting suspension was immediately transferred on a gel pad (1% agarose KB) located on a  
576 glass slide within an adhesive frame (GeneFrame, Thermo-Fisher). When dry, a cross-section  
577 of the pad was removed with a razor blade in order to allow gas exchanges to occur; the  
578 preparation was sealed with a glass cover-slip and transferred to the microscope incubation  
579 chamber pre-heated to 28°C. One GFP image was taken before starting the experiment in  
580 order to determine the capsulation status of each cell and phase-contrast images were then  
581 recorded every 10 minutes.

582 Phase contrast images were segmented with Fiji (ref. 70) and individual colony areas were  
583 extracted. For each colony analysed, the capsulation status of the founding cell was  
584 determined manually based on GFP signal. The logarithm of the growth rate of individual  
585 1B4 colonies was then fitted using a linear regression. For SBW25, segmented linear  
586 regressions were found to better fit the data and the slope of the first line was reported.

587

588 *RNAseq analyses*

589 RNAseq data were published previously<sup>9</sup>. KEGG orthology terms for the SBW25 genome  
590 were downloaded from the KEGG Orthology database ([www.genome.jp](http://www.genome.jp); accessed in April  
591 2016). KEGG enrichment statistics were computed with a hypergeometric test and were  
592 performed separately for up- and down-regulated genes. Data from the transcriptome  
593 analysis of SBW25 *gacS* mutant were retrieved from Supplementary Table 3 from ref. 26.

594

595 *Competition experiments*

596 SBW25 or SBW25-*lacZ* cell suspensions were spot-inoculated on separate KB agar plates and  
597 grown for 7 days. Cells from the centre of colonies were harvested, resuspended in Ringer's  
598 solution and gently centrifuged to enrich suspensions in capsulated or non-capsulated cells.  
599 Capsulated SBW25 cells were mixed with non-capsulated SBW-*lacZ* cells, and vice-versa.  
600 Mixed suspensions were diluted 1:100 in KB medium and grown at 28°C with orbital shaking  
601 for 4h. Appropriate dilutions of the cultures were plated on KB + X-gal plates at 0h, 2h and  
602 4h post-inoculation in order to measure the ratio of white-blue colonies. The difference in  
603 Malthusian parameters<sup>71</sup> was used as a measure of relative fitness.

604

605 *Statistical analyses*

606 All statistical analyses were performed in R (ref. 66). Parametric data were analysed with a  
607 two-tailed Welch's *t*-test. Non-parametric data were analysed with a Wilcoxon test (2  
608 samples) or with a Kruskal-Wallis test with Dunn's post-hoc correction (multiple  
609 comparisons). In Figure 5a,  $r^2$  indicates the adjusted R-squared value calculated from the  
610 linear regression. All *P* values are provided in Supplementary Table 5. All measurements  
611 were performed on distinct samples. The number of replicates indicate biological replicates,  
612 consisting of independent bacterial cultures or individual cells/micro-colonies (Figures 5b,  
613 6e and Supplementary Figure 4).

614

615 *Data availability*

616 Data and material are available from corresponding authors upon reasonable request.

617

618 **Acknowledgements:**

619 The authors thank Jenna Gallie and Camille De Almeida for discussion, Xue-Xian Zhang for  
620 the generous gift of pUIC3- $\Delta$ *gacA* deletion plasmid, Heather Hendrickson and Peter Lind for  
621 help with microscopy and flow cytometry, respectively, and Elena Denisenko for assistance  
622 with KEGG enrichment analyses. This work was supported in part by the Marsden Fund  
623 Council and a James Cook Research Fellowship from government funding administered by  
624 the Royal Society of New Zealand. SDM has received support under the program «  
625 Investissements d'Avenir » launched by the French Government and implemented by ANR

626 with the references ANR-10-LABX-54 MEMOLIFE and ANR-10-IDEX-0001-02 PSL\* Research  
627 University.

628

629 **Author contributions:**

630 PR and PBR designed the study, PR and GCF performed experiments and analysed the data,

631 SdM designed and analysed the mathematical model, PR and PBR wrote the paper with

632 contributions from all authors.

633

634 **References:**

- 635 1 Ackermann, M. A functional perspective on phenotypic heterogeneity in  
636 microorganisms. *Nat Rev Microbiol* **13**, 497-508, doi:10.1038/nrmicro3491 (2015).
- 637 2 van Boxtel, C., van Heerden, J. H., Nordholt, N., Schmidt, P. & Bruggeman, F. J.  
638 Taking chances and making mistakes: non-genetic phenotypic heterogeneity and its  
639 consequences for surviving in dynamic environments. *J R Soc Interface* **14**,  
640 doi:10.1098/rsif.2017.0141 (2017).
- 641 3 Bodi, Z. *et al.* Phenotypic heterogeneity promotes adaptive evolution. *PLoS Biol* **15**,  
642 e2000644, doi:10.1371/journal.pbio.2000644 (2017).
- 643 4 Fridman, O., Goldberg, A., Ronin, I., Shores, N. & Balaban, N. Q. Optimization of lag  
644 time underlies antibiotic tolerance in evolved bacterial populations. *Nature* **513**,  
645 418-421, doi:10.1038/nature13469 (2014).
- 646 5 Richard, M. & Yvert, G. How does evolution tune biological noise? *Front Genet* **5**,  
647 374, doi:10.3389/fgene.2014.00374 (2014).
- 648 6 Rotem, E. *et al.* Regulation of phenotypic variability by a threshold-based  
649 mechanism underlies bacterial persistence. *Proc Natl Acad Sci U S A* **107**, 12541-  
650 12546, doi:10.1073/pnas.1004333107 (2010).
- 651 7 Van den Bergh, B. *et al.* Frequency of antibiotic application drives rapid evolutionary  
652 adaptation of *Escherichia coli* persistence. *Nat Microbiol* **1**, 16020,  
653 doi:10.1038/nmicrobiol.2016.20 (2016).
- 654 8 Beaumont, H. J. E., Gallie, J., Kost, C., Ferguson, G. C. & Rainey, P. B. Experimental  
655 evolution of bet hedging. *Nature* **462**, 90-U97, doi:Doi 10.1038/Nature08504 (2009).
- 656 9 Gallie, J. *et al.* Bistability in a metabolic network underpins the de novo evolution of  
657 colony switching in *Pseudomonas fluorescens*. *PLoS Biol* **13**, e1002109,  
658 doi:10.1371/journal.pbio.1002109 (2015).
- 659 10 Vadia, S. & Levin, P. A. Growth rate and cell size: a re-examination of the growth law.  
660 *Curr Opin Microbiol* **24**, 96-103, doi:10.1016/j.mib.2015.01.011 (2015).
- 661 11 Dennis, P. P., Ehrenberg, M. & Bremer, H. Control of rRNA synthesis in *Escherichia*  
662 *coli*: a systems biology approach. *Microbiol Mol Biol Rev* **68**, 639-668,  
663 doi:10.1128/MMBR.68.4.639-668.2004 (2004).
- 664 12 Paul, B. J., Ross, W., Gaal, T. & Gourse, R. L. rRNA transcription in *Escherichia coli*.  
665 *Annu Rev Genet* **38**, 749-770, doi:10.1146/annurev.genet.38.072902.091347 (2004).
- 666 13 Keener, J. & Nomura, M. in *Escherichia coli and Salmonella: cellular and molecular*  
667 *biology* (eds F.C. Neidhardt *et al.*) 1417-1431 (American Society for Microbiology,  
668 1996).
- 669 14 Bollenbach, T., Quan, S., Chait, R. & Kishony, R. Nonoptimal microbial response to  
670 antibiotics underlies suppressive drug interactions. *Cell* **139**, 707-718,  
671 doi:10.1016/j.cell.2009.10.025 (2009).
- 672 15 Condon, C., French, S., Squires, C. & Squires, C. L. Depletion of functional ribosomal  
673 RNA operons in *Escherichia coli* causes increased expression of the remaining intact  
674 copies. *EMBO J* **12**, 4305-4315 (1993).
- 675 16 Gyorfy, Z. *et al.* Engineered ribosomal RNA operon copy-number variants of *E. coli*  
676 reveal the evolutionary trade-offs shaping rRNA operon number. *Nucleic Acids Res*  
677 **43**, 1783-1794, doi:10.1093/nar/gkv040 (2015).
- 678 17 Vakulskas, C. A., Potts, A. H., Babitzke, P., Ahmer, B. M. & Romeo, T. Regulation of  
679 bacterial virulence by Csr (Rsm) systems. *Microbiol Mol Biol Rev* **79**, 193-224,  
680 doi:10.1128/MMBR.00052-14 (2015).
- 681 18 Valentini, M., Gonzalez, D., Mavridou, D. A. & Filloux, A. Lifestyle transitions and  
682 adaptive pathogenesis of *Pseudomonas aeruginosa*. *Curr Opin Microbiol* **41**, 15-20,  
683 doi:10.1016/j.mib.2017.11.006 (2017).



- 684 19 Lapouge, K., Schubert, M., Allain, F. H. & Haas, D. Gac/Rsm signal transduction  
685 pathway of gamma-proteobacteria: from RNA recognition to regulation of social  
686 behaviour. *Mol Microbiol* **67**, 241-253, doi:10.1111/j.1365-2958.2007.06042.x  
687 (2008).
- 688 20 Norman, T. M., Lord, N. D., Paulsson, J. & Losick, R. Stochastic Switching of Cell Fate  
689 in Microbes. *Annu Rev Microbiol* **69**, 381-403, doi:10.1146/annurev-micro-091213-  
690 112852 (2015).
- 691 21 Veening, J. W., Smits, W. K. & Kuipers, O. P. Bistability, epigenetics, and bet-hedging  
692 in bacteria. *Annu Rev Microbiol* **62**, 193-210,  
693 doi:10.1146/annurev.micro.62.081307.163002 (2008).
- 694 22 Ferrell, J. E., Jr. & Ha, S. H. Ultrasensitivity part II: multisite phosphorylation,  
695 stoichiometric inhibitors, and positive feedback. *Trends Biochem Sci* **39**, 556-569,  
696 doi:10.1016/j.tibs.2014.09.003 (2014).
- 697 23 Buchler, N. E. & Cross, F. R. Protein sequestration generates a flexible ultrasensitive  
698 response in a genetic network. *Mol Syst Biol* **5**, 272, doi:10.1038/msb.2009.30  
699 (2009).
- 700 24 Buchler, N. E. & Louis, M. Molecular titration and ultrasensitivity in regulatory  
701 networks. *J Mol Biol* **384**, 1106-1119, doi:10.1016/j.jmb.2008.09.079 (2008).
- 702 25 Mukherji, S. *et al.* MicroRNAs can generate thresholds in target gene expression. *Nat*  
703 *Genet* **43**, 854-859, doi:10.1038/ng.905 (2011).
- 704 26 Cheng, X., de Bruijn, I., van der Voort, M., Loper, J. E. & Raaijmakers, J. M. The Gac  
705 regulon of *Pseudomonas fluorescens* SBW25. *Environ Microbiol Rep* **5**, 608-619,  
706 doi:10.1111/1758-2229.12061 (2013).
- 707 27 Mori, M., Schink, S., Erickson, D. W., Gerland, U. & Hwa, T. Quantifying the benefit of  
708 a proteome reserve in fluctuating environments. *Nat Commun* **8**, 1225,  
709 doi:10.1038/s41467-017-01242-8 (2017).
- 710 28 Ehrenberg, M., Bremer, H. & Dennis, P. P. Medium-dependent control of the  
711 bacterial growth rate. *Biochimie* **95**, 643-658, doi:10.1016/j.biochi.2012.11.012  
712 (2013).
- 713 29 Roberts, I. S. The biochemistry and genetics of capsular polysaccharide production in  
714 bacteria. *Annu Rev Microbiol* **50**, 285-315, doi:10.1146/annurev.micro.50.1.285  
715 (1996).
- 716 30 Rendueles, O., Garcia-Garcera, M., Neron, B., Touchon, M. & Rocha, E. P. C.  
717 Abundance and co-occurrence of extracellular capsules increase environmental  
718 breadth: Implications for the emergence of pathogens. *PLoS Pathog* **13**, e1006525,  
719 doi:10.1371/journal.ppat.1006525 (2017).
- 720 31 Kim, W., Levy, S. B. & Foster, K. R. Rapid radiation in bacteria leads to a division of  
721 labour. *Nat Commun* **7**, 10508, doi:10.1038/ncomms10508 (2016).
- 722 32 Kim, W., Racimo, F., Schluter, J., Levy, S. B. & Foster, K. R. Importance of positioning  
723 for microbial evolution. *Proc Natl Acad Sci U S A* **111**, E1639-1647,  
724 doi:10.1073/pnas.1323632111 (2014).
- 725 33 Zhang, X. X. & Rainey, P. B. Construction and validation of a neutrally-marked strain  
726 of *Pseudomonas fluorescens* SBW25. *J Microbiol Methods* **71**, 78-81,  
727 doi:10.1016/j.mimet.2007.07.001 (2007).
- 728 34 Blumer, C. & Haas, D. Multicopy suppression of a *gacA* mutation by the *infC* operon  
729 in *Pseudomonas fluorescens* CHA0: competition with the global translational  
730 regulator RsmA. *FEMS Microbiol Lett* **187**, 53-58 (2000).
- 731 35 Kitten, T. & Willis, D. K. Suppression of a sensor kinase-dependent phenotype in  
732 *Pseudomonas syringae* by ribosomal proteins L35 and L20. *J Bacteriol* **178**, 1548-  
733 1555 (1996).

- 734 36 Zhang, Q., Bhattacharya, S. & Andersen, M. E. Ultrasensitive response motifs: basic  
735 amplifiers in molecular signalling networks. *Open Biol* **3**, 130031,  
736 doi:10.1098/rsob.130031 (2013).
- 737 37 Broder, U. N., Jaeger, T. & Jenal, U. LadS is a calcium-responsive kinase that induces  
738 acute-to-chronic virulence switch in *Pseudomonas aeruginosa*. *Nat Microbiol* **2**,  
739 16184, doi:10.1038/nmicrobiol.2016.184 (2016).
- 740 38 Kim, J. S., Yamasaki, R., Song, S., Zhang, W. & Wood, T. K. Single Cell Observations  
741 Show Persister Cells Wake Based on Ribosome Content. *Environ Microbiol*,  
742 doi:10.1111/1462-2920.14093 (2018).
- 743 39 Bosdriesz, E., Molenaar, D., Teusink, B. & Bruggeman, F. J. How fast-growing bacteria  
744 robustly tune their ribosome concentration to approximate growth-rate  
745 maximization. *FEBS J* **282**, 2029-2044, doi:10.1111/febs.13258 (2015).
- 746 40 Dai, X. *et al.* Reduction of translating ribosomes enables *Escherichia coli* to maintain  
747 elongation rates during slow growth. *Nat Microbiol* **2**, 16231,  
748 doi:10.1038/nmicrobiol.2016.231 (2016).
- 749 41 Koch, A. L. The adaptive responses of *Escherichia coli* to a feast and famine  
750 existence. *Adv Microb Physiol* **6**, 147-217 (1971).
- 751 42 Li, S. H.-J. *et al.* *E. coli* translation strategies differ across nutrient conditions. *bioRxiv*,  
752 doi:doi.org/10.1101/224204 (2018).
- 753 43 Gaal, T., Bartlett, M. S., Ross, W., Turnbough, C. L., Jr. & Gourse, R. L. Transcription  
754 regulation by initiating NTP concentration: rRNA synthesis in bacteria. *Science* **278**,  
755 2092-2097 (1997).
- 756 44 Blank, D., Wolf, L., Ackermann, M. & Silander, O. K. The predictability of molecular  
757 evolution during functional innovation. *Proc Natl Acad Sci U S A* **111**, 3044-3049,  
758 doi:10.1073/pnas.1318797111 (2014).
- 759 45 Clarke, P. H. in *Evolution from Molecules to Men* (ed Bendall D.S.) 235-252  
760 (Cambridge University Press, 1983).
- 761 46 Hall, B. G. Experimental evolution of a new enzymatic function. Kinetic analysis of  
762 the ancestral (ebg) and evolved (ebg) enzymes. *J Mol Biol* **107**, 71-84 (1976).
- 763 47 Hindre, T., Knibbe, C., Beslon, G. & Schneider, D. New insights into bacterial  
764 adaptation through in vivo and in silico experimental evolution. *Nat Rev Microbiol*  
765 **10**, 352-365, doi:10.1038/nrmicro2750 (2012).
- 766 48 Laan, L., Koschwanez, J. H. & Murray, A. W. Evolutionary adaptation after crippling  
767 cell polarization follows reproducible trajectories. *Elife* **4**, doi:10.7554/eLife.09638  
768 (2015).
- 769 49 Rainey, P. B., Remigi, P., Farr, A. D. & Lind, P. A. Darwin was right: where now for  
770 experimental evolution? *Curr Opin Genet Dev* **47**, 102-109,  
771 doi:10.1016/j.gde.2017.09.003 (2017).
- 772 50 Korem Kohanim, Y., Levi, D., Jona, G., Bren, A. & Alon, U. A bacterial growth law out  
773 of steady-state. *bioRxiv*, doi:doi.org/10.1101/257709 (2018).
- 774 51 Metzl-Raz, E. *et al.* Principles of cellular resource allocation revealed by condition-  
775 dependent proteome profiling. *Elife* **6**, doi:10.7554/eLife.28034 (2017).
- 776 52 Joers, A. & Tenson, T. Growth resumption from stationary phase reveals memory in  
777 *Escherichia coli* cultures. *Sci Rep* **6**, 24055, doi:10.1038/srep24055 (2016).
- 778 53 Stearns, S. C. *The evolution of life histories*. (Oxford University Press, 1992).
- 779 54 Evans, A. S. & Cabin, R. J. Can Dormancy Affect the Evolution of Post-Germination  
780 Traits? The Case of *Lesquerella fendleri*. *Ecology* **76**, 344-356, doi:10.2307/1941194  
781 (1995).
- 782 55 King, E. O., Ward, M. K. & Raney, D. E. Two simple media for the demonstration of  
783 pyocyanin and fluorescein. *J Lab Clin Med* **44**, 301-307 (1954).

- 784 56 Sambrook, J., Fritsch, E. F. & Maniatis, T. *Molecular cloning: a laboratory manual*.  
785 2nd edn, (Cold Spring Harbor Laboratory, 1989).
- 786 57 Ho, S. N., Hunt, H. D., Horton, R. M., Pullen, J. K. & Pease, L. R. Site-directed  
787 mutagenesis by overlap extension using the polymerase chain reaction. *Gene* **77**, 51-  
788 59 (1989).
- 789 58 Ditta, G., Stanfield, S., Corbin, D. & Helinski, D. R. Broad host range DNA cloning  
790 system for gram-negative bacteria: construction of a gene bank of *Rhizobium*  
791 *meliloti*. *Proc Natl Acad Sci U S A* **77**, 7347-7351 (1980).
- 792 59 Bao, Y., Lies, D. P., Fu, H. & Roberts, G. P. An improved Tn7-based system for the  
793 single-copy insertion of cloned genes into chromosomes of gram-negative bacteria.  
794 *Gene* **109**, 167-168 (1991).
- 795 60 Rainey, P. B. Adaptation of *Pseudomonas fluorescens* to the plant rhizosphere.  
796 *Environ Microbiol* **1**, 243-257 (1999).
- 797 61 Farr, A. D., Remigi, P. & Rainey, P. B. Adaptive evolution by spontaneous domain  
798 fusion and protein relocalization. *Nat Ecol Evol* **1**, 1562-1568, doi:10.1038/s41559-  
799 017-0283-7 (2017).
- 800 62 Heeb, S., Blumer, C. & Haas, D. Regulatory RNA as mediator in GacA/RsmA-  
801 dependent global control of exoproduct formation in *Pseudomonas fluorescens*  
802 CHA0. *J Bacteriol* **184**, 1046-1056 (2002).
- 803 63 Lambertsen, L., Sternberg, C. & Molin, S. Mini-Tn7 transposons for site-specific  
804 tagging of bacteria with fluorescent proteins. *Environ Microbiol* **6**, 726-732,  
805 doi:10.1111/j.1462-2920.2004.00605.x (2004).
- 806 64 Choi, K. H. *et al.* A Tn7-based broad-range bacterial cloning and expression system.  
807 *Nat Methods* **2**, 443-448, doi:10.1038/nmeth765 (2005).
- 808 65 You, C. *et al.* Coordination of bacterial proteome with metabolism by cyclic AMP  
809 signalling. *Nature* **500**, 301-306, doi:10.1038/nature12446 (2013).
- 810 66 R: A language and environment for statistical computing. (R Foundation for  
811 Statistical Computing, Vienna, Austria, 2016).
- 812 67 flowCore: Basic structures for flow cytometry data (R package version 1.44.0., 2017).
- 813 68 KernSmooth: Functions for Kernel Smoothing supporting Wand & Jones (1995) (R  
814 package version 2.23-15, 2015).
- 815 69 Ducret, A., Quardokus, E. M. & Brun, Y. V. MicrobeJ, a tool for high throughput  
816 bacterial cell detection and quantitative analysis. *Nat Microbiol* **1**, 16077,  
817 doi:10.1038/nmicrobiol.2016.77 (2016).
- 818 70 Schindelin, J. *et al.* Fiji: an open-source platform for biological-image analysis. *Nat*  
819 *Methods* **9**, 676-682, doi:10.1038/nmeth.2019 (2012).
- 820 71 Lenski, R. E., Rose, M. R., Simpson, S. C. & Tadler, S. C. Long-Term Experimental  
821 Evolution in *Escherichia coli*. I. Adaptation and Divergence During 2,000 Generations.  
822 *The American Naturalist* **138**, 1315-1341, doi:10.1086/285289 (1991).

823

824
